# Supplementary material for: Untargeted plasma and tissue metabolomics in rats with chronic kidney disease given AST-120
Source: PubMed Central journal article supplement (PMC4773761; doi:10.1038/srep22526), 2016-03-02
Supplement: srep22526-s1.pdf [file srep22526-s1.pdf]

## Untargeted plasma and tissue metabolomics in rats with chronic kidney disease given AST-120.

Thomas J Velenosi<sup>1</sup>, Anzel Hennop<sup>1</sup>, David A Feere<sup>1</sup>, Alvin Tieu<sup>1</sup>, Andrew S Kucey<sup>1</sup>, Polydoros Kyriacou<sup>2</sup>, Laura E McCuaig<sup>1</sup>, Stephanie E Nevison<sup>1</sup>, Michael A Kerr<sup>2</sup>, Bradley L Urquhart<sup>1,3,4,\*</sup>

### Supplemental Figure:

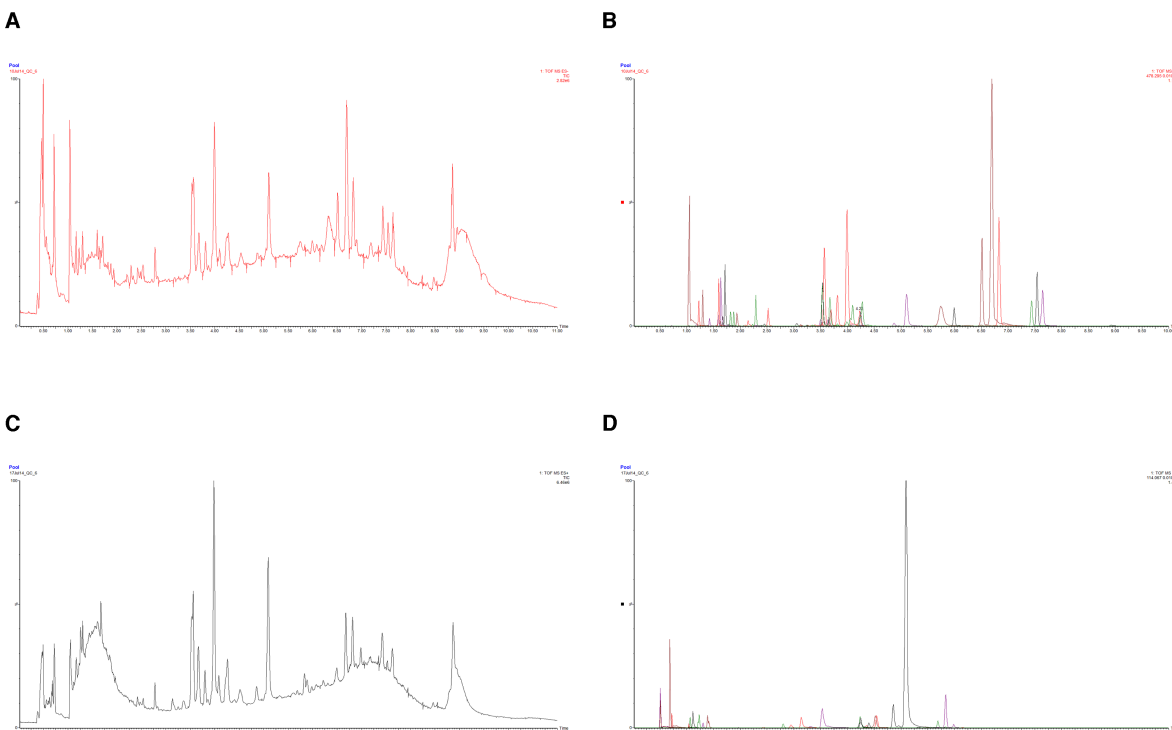

**Supplemental Figure S1. Representative chromatograms of total ionic current (TIC) and extracted ions from a pooled rat kidney sample.** Negative electrospray ionization mode TIC (A) and overlaid extracted ion chromatograms (B) of metabolites in Table 2 and Supplementary Table S5 from a single injection of pooled rat kidney sample. Positive electrospray ionization mode TIC (C) and overlaid extracted ion chromatograms (D) are also presented for a single injection.

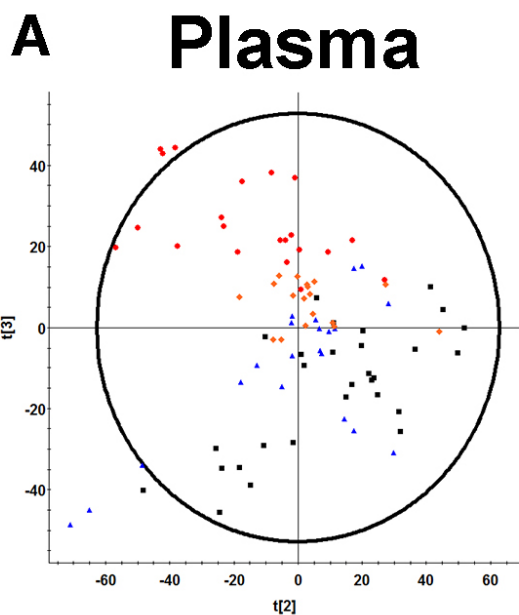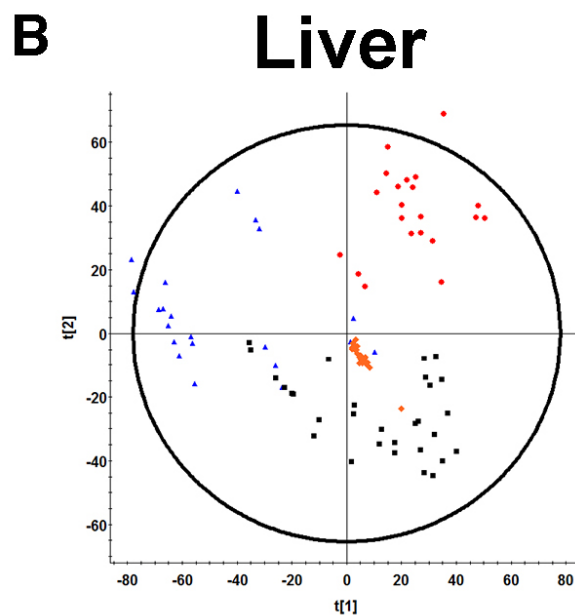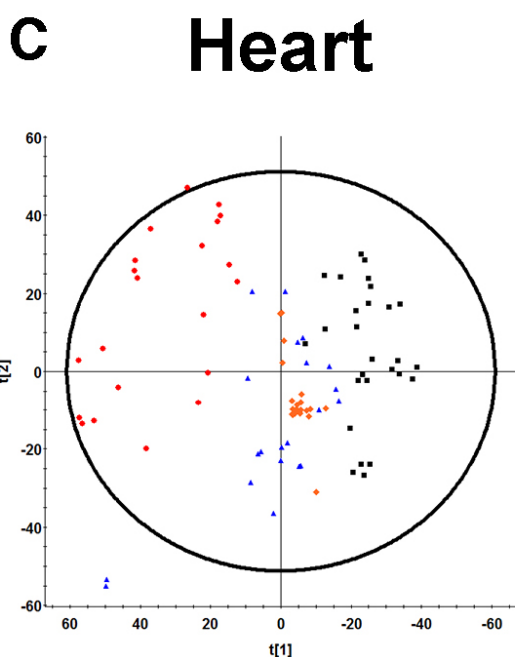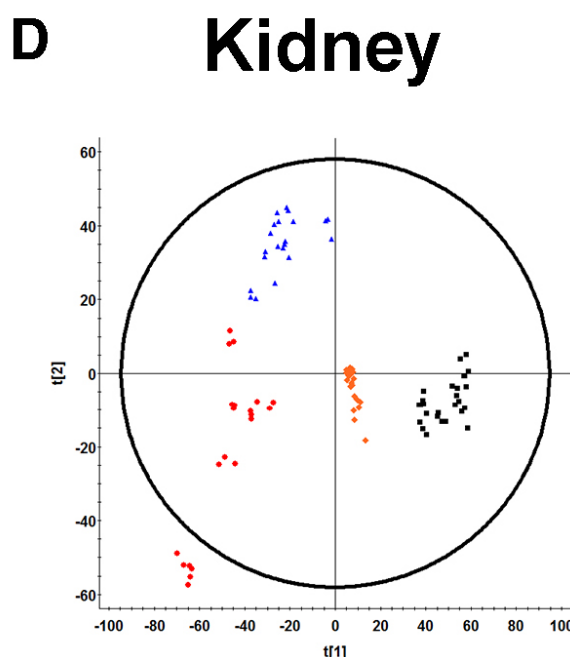

**Supplemental Figure S2. Principle component analysis with pooled injections in negative ESI mode.** Control (■), CKD (●), CKD+AST-120 (▲) and pooled (◆) negative ESI mode principle component analysis of plasma (A), liver (B), heart (C) and kidney (D) tissue in rats. Triplicate injections are shown.

## A Heart

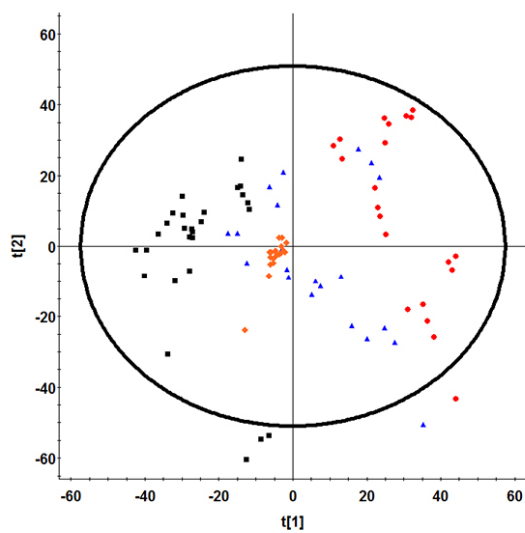

## B Kidney

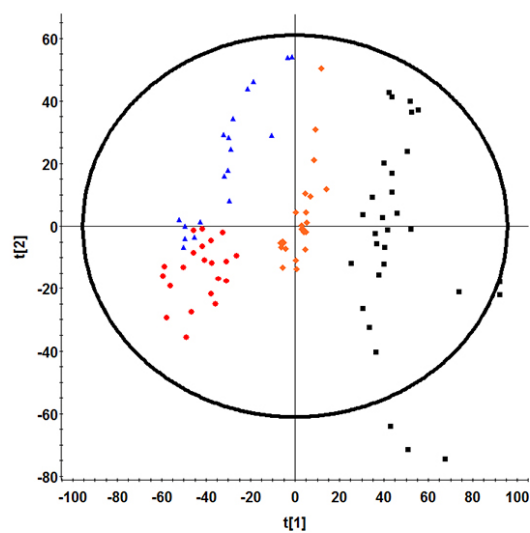

**Supplemental Figure S3. Principle component analysis with pooled injections in positive ESI mode.** Control (■), CKD (●), CKD+AST-120 (▲) and pooled (◆) negative ESI mode principle component analysis of heart (A) and kidney (B) tissue in rats. Triplicate injections are shown.

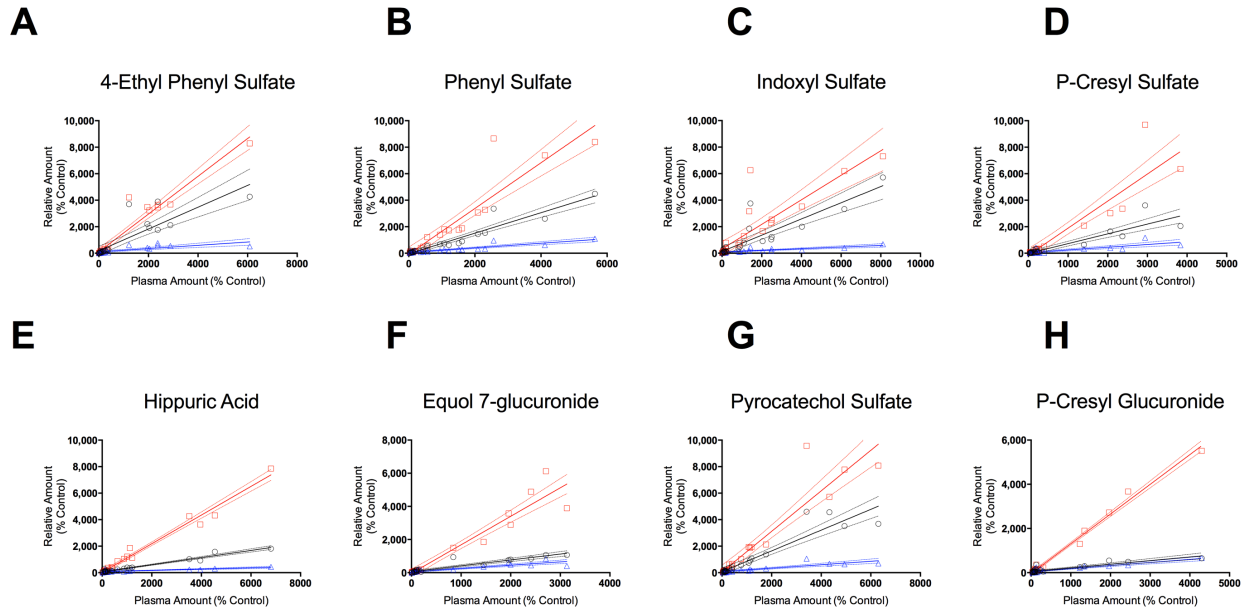

**Supplemental Figure S4. Correlations between plasma and tissues for 8 gut-derived uremic toxins.** Plasma levels of 4-ethylphenyl sulfate (A), phenyl sulfate (B), indoxyl sulfate (C), p-cresyl sulfate (D), hippuric acid (E), equol 7-glucuronide (F), pyrocatechol sulfate (G) and p-cresyl glucuronide (H) were correlated to liver (○), heart (◻) and kidney (△) levels for control, CKD and CKD+AST-120 groups. Linear regressions (solid lines) are presented with 95% confidence intervals (dashed lines).

**Supplemental Table S5:** Summary of metabolites altered in plasma, liver, heart and kidney tissue in rats with CKD compared to control and CKD+AST-120.

| Ion | $t_R$ (min) | Mass (m/z) | Empirical Formula | Mass Error (ppm) | Identity                     | Tissue | Change compared to Control |            |        |          | Change compared to CKD+AST-120 |        |          | Metabolite ID Level |
|-----|-------------|------------|-------------------|------------------|------------------------------|--------|----------------------------|------------|--------|----------|--------------------------------|--------|----------|---------------------|
|     |             |            |                   |                  |                              |        | Direction                  | S-plot VIP | Fold   | P-value  | Direction                      | Fold   | P-value  |                     |
| 9   | 1.30        | 203.0818   | C11H11N2O2[H-]    | 1.5              | L-Tryptophan                 | Plasma | ↓                          | 2.86       | 0.34   | 2.08E-10 | ↓                              | 0.68   | 5.65E-03 | 1                   |
|     |             |            |                   |                  |                              | Liver  | ↓                          | 4.62       | 0.82   | 7.46E-06 | ↓                              | 0.91   | 1.13E-01 |                     |
|     |             |            |                   |                  |                              | Heart  | ↓                          | 3.72       | 0.72   | 4.89E-10 | ↓                              | 0.81   | 2.83E-08 |                     |
|     |             |            |                   |                  |                              | Kidney | ↓                          | 6.49       | 0.41   | 4.89E-10 | ↓                              | 0.70   | 5.80E-04 |                     |
| 10  | 2.15        | 514.2833   | C26H44NO7S[H-]    | 1.6              | Taurocholic acid             | Plasma | ↑                          | 1.57       | 3.88   | 2.14E-05 | ↑                              | 1.02   | 1.00E+00 | 2                   |
|     |             |            |                   |                  |                              | Liver  | ↑                          | 10.38      | 1.68   | 2.79E-02 | ↑                              | 1.40   | 2.52E-01 |                     |
|     |             |            |                   |                  |                              | Heart  | ↑                          | 0.80       | 1.42   | 8.94E-02 | ↓                              | 0.81   | 3.23E-01 |                     |
|     |             |            |                   |                  |                              | Kidney | ↓                          | 1.00       | 0.34   | 3.45E-03 | ↓                              | 0.68   | 8.64E-01 |                     |
| 11  | 2.21        | 321.0443   | C15H13O6S[H-]     | -3.1             | Equol 4-Sulfate              | Plasma | NA                         |            |        |          | NA                             |        |          | 2                   |
|     |             |            |                   |                  |                              | Liver  | ↑                          | 10.38      | 10.38  | 4.89E-10 | ↑                              | 160.97 | 4.89E-10 |                     |
|     |             |            |                   |                  |                              | Heart  | ↑                          | 0.04       | 1.15   | 8.36E-01 | ↑                              | 28.71  | 4.90E-07 |                     |
|     |             |            |                   |                  |                              | Kidney | ↓                          | 1.99       | 0.30   | 4.61E-09 | ↑                              | 35.87  | 4.73E-02 |                     |
| 12  | 1.42        | 217.0176   | C8H9O5S[H-]       | 2.3              | Tyrosol 4-Sulfate            | Plasma | NA                         |            |        |          | NA                             |        |          | 2                   |
|     |             |            |                   |                  |                              | Liver  | ↑                          | 6.39       | 129.42 | 4.99E-10 | ↑                              | 67.42  | 7.62E-10 |                     |
|     |             |            |                   |                  |                              | Heart  | ↑                          | 4.85       | 291.44 | 4.98E-10 | ↑                              | 55.28  | 7.88E-10 |                     |
|     |             |            |                   |                  |                              | Kidney | ↑                          | 5.40       | 28.42  | 4.89E-10 | ↑                              | 38.61  | 4.90E-10 |                     |
| 13  | 2.42        | 498.2896   | C26H44NO6S[H-]    | -1.4             | Taurodeoxy(cheno)cholic acid | Plasma | NA                         |            |        |          | NA                             |        |          | 3                   |
|     |             |            |                   |                  |                              | Liver  | ↓                          | 14.06      | 0.60   | 6.77E-03 | ↓                              | 0.59   | 1.17E-02 |                     |
|     |             |            |                   |                  |                              | Heart  | ↓                          | 0.88       | 0.63   | 2.99E-01 | ↓                              | 0.27   | 9.09E-10 |                     |
|     |             |            |                   |                  |                              | Kidney | ↓                          | 1.18       | 0.28   | 6.68E-03 | ↓                              | 0.44   | 4.40E-01 |                     |
| 14  | 6.67        | 303.2335   | C20H31O2[H-]      | -3.6             | Arachidonic Acid             | Plasma | NA                         |            |        |          | NA                             |        |          | 2                   |
|     |             |            |                   |                  |                              | Liver  | ↓                          | 11.59      | 0.89   | 7.64E-01 | ↑                              | 1.10   | 9.20E-01 |                     |
|     |             |            |                   |                  |                              | Heart  | ↑                          | 7.10       | 1.05   | 4.28E-01 | ↑                              | 1.05   | 5.32E-01 |                     |
|     |             |            |                   |                  |                              | Kidney | ↓                          | 1.18       | 0.85   | 1.00E-04 | ↓                              | 0.87   | 4.81E-03 |                     |
| 15  | 6.80        | 279.2332   | C18H31O2[H-]      | -2.9             | Linoleic Acid                | Plasma | NA                         |            |        |          | NA                             |        |          | 2                   |
|     |             |            |                   |                  |                              | Liver  | ↓                          | 9.01       | 0.95   | 6.72E-01 | ↓                              | 0.87   | 2.81E-02 |                     |
|     |             |            |                   |                  |                              | Heart  | ↑                          | 7.66       | 1.00   | 1.00E+00 | ↑                              | 1.04   | 8.62E-01 |                     |
|     |             |            |                   |                  |                              | Kidney | ↓                          | 10.07      | 0.66   | 7.63E-08 | ↓                              | 0.78   | 1.57E-02 |                     |
| 16  | 7.40        | 255.2334   | C16H31O2[H-]      | 0                | Palmitic Acid                | Plasma | ↓                          | 0.90       | 0.97   | 9.98E-01 | ↑                              | 1.00   | 1.00E+00 | 1                   |
|     |             |            |                   |                  |                              | Liver  | ↓                          | 11.99      | 0.78   | 8.98E-02 | ↓                              | 0.55   | 1.37E-08 |                     |
|     |             |            |                   |                  |                              | Heart  | ↑                          | 0.53       | 1.16   | 6.33E-03 | ↑                              | 1.02   | 9.79E-01 |                     |
|     |             |            |                   |                  |                              | Kidney | ↓                          | 4.74       | 0.66   | 2.66E-04 | ↓                              | 0.79   | 2.07E-01 |                     |
| 17  | 7.61        | 281.2491   | C18H33O2[H-]      | -3.5             | Oleic Acid                   | Plasma | NA                         |            |        |          | NA                             |        |          | 1                   |
|     |             |            |                   |                  |                              | Liver  | ↓                          | 10.68      | 0.85   | 4.12E-01 | ↓                              | 0.64   | 1.33E-04 |                     |
|     |             |            |                   |                  |                              | Heart  | ↓                          | 0.36       | 0.83   | 8.06E-01 | ↓                              | 0.89   | 9.59E-01 |                     |
|     |             |            |                   |                  |                              | Kidney | ↓                          | 3.63       | 0.81   | 1.56E-01 | ↓                              | 0.73   | 1.36E-02 |                     |
| 18  | 5.97        | 301.2178   | C20H29O2[H-]      | -3.3             | Eicosapentaenoic Acid        | Plasma | NA                         |            |        |          | NA                             |        |          | 2                   |
|     |             |            |                   |                  |                              | Liver  | ↓                          | 9.53       | 0.84   | 2.29E-01 | ↓                              | 0.67   | 1.05E-04 |                     |
|     |             |            |                   |                  |                              | Heart  | ↑                          | 5.59       | 2.00   | 7.96E-08 | ↑                              | 1.89   | 2.70E-06 |                     |
|     |             |            |                   |                  |                              | Kidney | ↓                          | 5.05       | 0.51   | 5.69E-10 | ↓                              | 0.71   | 1.90E-02 |                     |
| 19  | 6.51        | 327.2335   | C22H31O2[H-]      | 3.4              | Docosahexaenoic Acid         | Plasma | NA                         |            |        |          | NA                             |        |          | 2                   |
|     |             |            |                   |                  |                              | Liver  | ↓                          | 7.29       | 0.98   | 9.91E-01 | ↓                              | 0.78   | 1.02E-02 |                     |
|     |             |            |                   |                  |                              | Heart  | ↑                          | 2.67       | 1.16   | 4.03E-02 | ↑                              | 1.09   | 4.72E-01 |                     |
|     |             |            |                   |                  |                              | Kidney | ↓                          | 14.17      | 0.38   | 4.89E-10 | ↓                              | 0.75   | 2.83E-02 |                     |

|        |      |          |                        |          |                                         |        |          |          |        |          |          |       |          |   |
|--------|------|----------|------------------------|----------|-----------------------------------------|--------|----------|----------|--------|----------|----------|-------|----------|---|
| 20     | 1.23 | 218.1037 | C9H16NO5[H-]           | 4.1      | D-pantothenic Acid                      | Plasma | NA       |          |        |          | NA       |       |          |   |
|        |      |          |                        |          |                                         | Liver  | ↑        | 2.92     | 1.01   | 9.99E-01 | ↑        | 1.09  | 8.18E-01 | 2 |
|        | 1.23 | 220.1194 | C9H18NO5[H+]           | 4.1      |                                         | Heart  | ↓        | 11.72    | 0.86   | 9.58E-01 | ↓        | 0.47  | 1.49E-02 |   |
|        |      |          |                        | Kidney   | ↓                                       | 4.10   | 0.67     | 5.19E-10 | ↑      | 1.65     | 3.56E-07 |       |          |   |
| 21     | 1.88 | 297.0975 | C14H17O7[H-]           | -0.3     | Phenylethanol Glucuronide               | Plasma | NA       |          |        |          | NA       |       |          |   |
|        |      |          |                        |          |                                         | Liver  | ↑        | 4.61     | 7.91   | 4.89E-10 | ↑        | 27.74 | 4.89E-10 | 2 |
|        |      |          |                        |          |                                         | Heart  | ↑        | 6.14     | 54.66  | 4.89E-10 | ↑        | 46.89 | 4.89E-10 |   |
| Kidney | ↑    | 7.73     | 6.42                   | 4.89E-10 | ↑                                       | 42.09  | 4.89E-10 |          |        |          |          |       |          |   |
| 22     | 0.70 | 306.0771 | C10H16N3O6S[H-]        | 3.6      | Glutathione                             | Plasma | NA       |          |        |          | NA       |       |          |   |
|        |      |          |                        |          |                                         | Liver  | ↓        | 5.04     | 0.84   | 7.18E-01 | ↑        | 1.34  | 5.63E-01 | 1 |
|        | 0.72 | 308.0923 | C10H18N3O6S[H+]        | 2.3      |                                         | Heart  | ↑        | 7.67     | 1.70   | 5.37E-05 | ↓        | 0.98  | 9.94E-01 |   |
|        |      |          |                        | Kidney   | ↓                                       | 0.57   | 0.07     | 5.26E-10 | ↓      | 0.49     | 9.37E-01 |       |          |   |
| 23     | 7.54 | 331.2647 | C22H35O2[H-]           | 3.0      | Adrenic Acid                            | Plasma | NA       |          |        |          | NA       |       |          |   |
|        |      |          |                        |          |                                         | Liver  | ↓        | 3.43     | 0.87   | 7.59E-01 | ↓        | 0.56  | 5.67E-05 | 2 |
|        |      |          |                        |          |                                         | Heart  | ↑        | 3.96     | 1.62   | 8.96E-07 | ↑        | 1.30  | 1.09E-02 |   |
| Kidney | ↑    | 10.13    | 2.57                   | 4.89E-10 | ↓                                       | 0.78   | 2.79E-06 |          |        |          |          |       |          |   |
| 24     | 1.63 | 245.0124 | C9H11O7S<br>(-H2O)[H-] | 1.6      | 3-Methoxy-4-Hydroxyphenylglycol sulfate | Plasma | NA       |          |        |          | NA       |       |          |   |
|        |      |          |                        |          |                                         | Liver  | ↑        | 3.10     | 18.14  | 4.89E-10 | ↑        | 10.04 | 4.89E-10 | 2 |
|        |      |          |                        |          |                                         | Heart  | ↑        | 3.50     | 106.17 | 4.89E-10 | ↑        | 10.22 | 4.89E-10 |   |
|        |      |          |                        | Kidney   | ↑                                       | 4.70   | 7.98     | 4.89E-10 | ↑      | 6.94     | 4.89E-10 |       |          |   |
| 25     | 3.98 | 540.3313 | C25H51NO9P[CHOOH-]     | 2.2      | LysoPC(16:0)                            | Plasma | ↑        | 1.42     | 2.38   | 1.30E-04 | ↑        | 1.26  | 4.71E-01 | 3 |
|        |      |          |                        |          |                                         | Liver  | ↑        | 5.68     | 1.01   | 9.92E-01 | ↑        | 1.01  | 9.83E-01 |   |
|        | 3.99 | 496.3407 | C24H51NO7P[H+]         | 0.8      |                                         | Heart  | ↓        | 10.10    | 0.91   | 6.26E-02 | ↓        | 0.99  | 9.98E-01 |   |
|        |      |          |                        | Kidney   | ↑                                       | 1.90   | 1.70     | 4.89E-10 | ↑      | 1.05     | 4.07E-01 |       |          |   |
| 26     | 3.67 | 564.3316 | C26H49NO7P[CHOOH-]     | 2.7      | LysoPC(18:2)                            | Plasma |          | NA       |        |          | NA       |       |          |   |
|        |      |          |                        |          |                                         | Liver  | ↑        | 2.95     | 1.02   | 9.80E-01 | ↓        | 0.94  | 5.02E-01 | 3 |
|        | 3.67 | 520.3412 | C26H51NO7P[H+]         | 1.7      |                                         | Heart  | ↓        | 9.70     | 0.66   | 8.72E-10 | ↓        | 0.83  | 4.32E-02 |   |
|        |      |          |                        | Kidney   | ↓                                       | 2.27   | 0.83     | 1.69E-02 | ↑      | 1.09     | 6.92E-01 |       |          |   |
| 27     | 3.63 | 476.2791 | C23H43NO7P[H-]         | 2.9      | LysoPE (18:2)                           | Plasma | NA       |          |        |          | NA       |       |          |   |
|        |      |          |                        |          |                                         | Liver  | ↓        | 3.22     | 0.75   | 1.12E-03 | ↓        | 0.63  | 3.60E-08 | 3 |
|        | 3.67 | 520.3412 | C26H51NO7P[H+]         | 1.7      |                                         | Heart  | ↓        | 6.94     | 0.60   | 3.25E-07 | ↓        | 0.77  | 6.21E-02 |   |
|        |      |          |                        | Kidney   | ↓                                       | 3.27   | 0.38     | 4.46E-09 | ↓      | 0.97     | 9.99E-01 |       |          |   |
| 28     | 4.25 | 436.2837 | C21H43NO6P[H-]         | 2.1      | PE(P-16:0/0:0)                          | Plasma | NA       |          |        |          | NA       |       |          |   |
|        |      |          |                        |          |                                         | Liver  | ↓        | 0.38     | 0.95   | 9.93E-01 | ↓        | 0.60  | 1.06E-02 | 3 |
|        |      |          |                        |          |                                         | Heart  | ↓        | 5.60     | 0.76   | 1.59E-05 | ↓        | 0.83  | 2.78E-02 |   |
|        |      |          |                        | Kidney   | ↑                                       | 5.50   | 2.54     | 4.89E-10 | ↑      | 1.24     | 5.99E-03 |       |          |   |
| 29     | 5.66 | 619.2898 | C29H48O12P[H-]         | 2.4      | (PI)20:4)                               | Plasma | ↑        |          | 30.87  | 2.11E-10 | ↑        | 3.72  | 2.93E-07 | 3 |
|        |      |          |                        |          |                                         | Liver  | ↑        | 1.45     | 1.25   | 2.80E-03 | ↓        | 0.86  | 4.56E-02 |   |
|        |      |          |                        |          |                                         | Heart  | ↓        | 4.90     | 0.89   | 2.22E-01 | ↓        | 0.94  | 8.08E-01 |   |
|        |      |          |                        | Kidney   | ↓                                       | 7.50   | 0.37     | 4.89E-10 | ↓      | 0.67     | 8.60E-04 |       |          |   |
| 30     | 3.57 | 588.3313 | C29H51NO9P[HCOOH-]     | 2.0      | LysoPC(20:4)                            | Plasma | NA       |          |        |          | NA       |       |          |   |
|        |      |          |                        |          |                                         | Liver  | ↑        | 5.39     | 1.07   | 2.52E-04 | ↑        | 1.07  | 1.41E-03 | 3 |
|        | 3.57 | 544.3408 | C28H51NO7P[H+]         | 0.9      |                                         | Heart  | ↑        | 1.40     | 1.10   | 6.25E-02 | ↑        | 1.21  | 7.91E-05 |   |
|        |      |          |                        | Kidney   | ↑                                       | 9.70   | 1.69     | 4.89E-10 | ↓      | 0.99     | 9.99E-01 |       |          |   |
| 31     | 4.10 | 566.3472 | C27H53NO9P[HCOOH-]     | 2.5      | LysoPC(18:1)                            | Plasma | ↑        |          | 2.71   | 9.89E-05 | ↑        | 1.83  | 1.74E-02 | 3 |
|        |      |          |                        |          |                                         | Liver  | ↑        | 3.41     | 1.14   | 3.05E-01 | ↑        | 1.27  | 2.54E-02 |   |
|        | 4.08 | 522.3566 | C26H53NO7P[H+]         | 1.1      |                                         | Heart  | ↑        | 0.58     | 1.17   | 6.80E-02 | ↑        | 1.20  | 4.71E-02 |   |
|        |      |          |                        | Kidney   | ↑                                       | 6.66   | 2.46     | 4.89E-10 | ↑      | 1.04     | 8.59E-01 |       |          |   |
| 32     | 5.11 | 508.3415 | C25H51NO7P[H-]         | 2.4      | LysoPC(17:0) or LysoPE(20:0)            | Plasma | NA       |          |        |          | NA       |       |          |   |
|        |      |          |                        |          |                                         | Liver  | ↑        | 1.45     | 1.15   | 1.47E-02 | ↑        | 1.04  | 8.84E-01 | 3 |
|        |      |          |                        |          |                                         | Heart  | ↓        | 3.72     | 0.88   | 8.49E-01 | ↓        | 0.74  | 2.32E-01 |   |
|        |      |          |                        | Kidney   | ↑                                       | 5.18   | 1.44     | 4.89E-10 | ↑      | 1.24     | 1.66E-08 |       |          |   |



|    |      |          |                |     |                                                |        |   |       |      |          |   |      |          |   |
|----|------|----------|----------------|-----|------------------------------------------------|--------|---|-------|------|----------|---|------|----------|---|
| 54 | 1.12 | 257.1149 | C11H16N2O5     | 4.7 | 1-beta-d-Ribofuranosyl-1,4-dihydronicotinamide | Heart  | ↓ | 3.65  | 0.30 | 3.01E-08 | ↓ | 0.55 | 3.56E-10 | 2 |
|    |      |          |                |     |                                                | Kidney | ↓ | 10.00 | 0.07 | 4.89E-10 | ↓ | 1.06 | 1.00E+00 |   |
| 55 | 1.40 | 246.1712 | C12H24NO4[H+]  | 2.8 | 2-methylbutyroylcarnitine or pivaloylcarnitine | Heart  | ↓ | 9.87  | 0.26 | 3.56E-10 | ↓ | 0.40 | 3.56E-10 | 3 |
|    |      |          |                |     |                                                | Kidney | ↓ | 8.48  | 0.07 | 4.89E-10 | ↓ | 0.64 | 8.54E-01 |   |
| 56 | 3.12 | 424.3431 | C25H46NO4[H+]  | 0.9 | Linoleyl or Linoelaidyl Carnitine              | Heart  | ↓ | 17.44 | 0.47 | 6.26E-10 | ↓ | 0.67 | 1.53E-02 | 3 |
|    |      |          |                |     |                                                | Kidney | ↓ | 7.06  | 0.33 | 4.89E-10 | ↓ | 0.63 | 8.63E-04 |   |
| 57 | 1.06 | 262.1661 | C12H24O5N1[H+] | 2.7 | 3-Hydroxyisovalerylcarnitine                   | Heart  | ↓ | 6.92  | 0.42 | 3.56E-10 | ↓ | 0.51 | 7.99E-08 | 2 |
|    |      |          |                |     |                                                | Kidney | ↓ | 7.61  | 0.13 | 4.89E-10 | ↓ | 0.70 | 4.90E-01 |   |



Supplementary Table S6. Metabolite pathway analysis using MetaboAnalyst 3.0

| Number | Pathway                                               | Tissue | Total | Hits | Raw p      | -LOG(p)  | Holm Adjust | FDR        | Impact  |
|--------|-------------------------------------------------------|--------|-------|------|------------|----------|-------------|------------|---------|
| 1      | Phenylalanine metabolism                              | Plasma | 45    | 1    | 9.27E-10   | 20.799   | 6.49E-09    | 6.49E-09   | 0.0315  |
|        |                                                       | Liver  | 45    | 1    | 8.50E-11   | 23.189   | 1.10E-09    | 2.89E-10   | 0.0315  |
|        |                                                       | Heart  | 45    | 1    | 2.52E-08   | 17.495   | 3.28E-07    | 1.26E-07   | 0.0315  |
|        |                                                       | Kidney | 45    | 1    | 2.01E-07   | 15.419   | 2.41E-06    | 6.44E-07   | 0.0315  |
| 2      | Primary bile acid biosynthesis                        | Plasma | 47    | 1    | 2.77E-06   | 12.795   | 1.66E-05    | 6.47E-06   | 0.00846 |
|        |                                                       | Liver  | 47    | 2    | 0.024685   | 3.7015   | 0.14811     | 0.034971   | 0.01692 |
|        |                                                       | Heart  | 47    | 2    | 0.017285   | 4.0579   | 0.121       | 0.028809   | 0.01692 |
|        |                                                       | Kidney | 47    | 2    | 1.12E-05   | 11.399   | 7.84E-05    | 1.79E-05   | 0.01692 |
| 3      | Taurine and hypotaurine metabolism                    | Plasma | 20    | 1    | 2.77E-06   | 12.795   | 1.66E-05    | 6.47E-06   | 0       |
|        |                                                       | Liver  | 20    | 1    | 1.23E-06   | 13.611   | 1.47E-05    | 3.48E-06   | 0       |
|        |                                                       | Heart  | 20    | 1    | 0.01284    | 4.3552   | 0.11015     | 0.024076   | 0       |
|        |                                                       | Kidney | 20    | 1    | 0.010651   | 4.5421   | 0.021301    | 0.011361   | 0       |
| 4      | Glycerophospholipid metabolism                        | Plasma | 39    | 1    | 0.00018895 | 8.574    | 0.00075579  | 0.00033066 | 0.00317 |
|        |                                                       | Liver  | 39    | 2    | 0.85934    | 0.15159  | 1           | 0.85934    | 0.1307  |
|        |                                                       | Heart  | 39    | 2    | 0.012239   | 4.4031   | 0.11015     | 0.024076   | 0.1307  |
|        |                                                       | Kidney | 39    | 3    | 2.70E-07   | 15.124   | 2.97E-06    | 7.20E-07   | 0.14055 |
| 5      | Fatty acid metabolism                                 | Plasma | 50    | 1    | 0.25548    | 1.3646   | 0.76645     | 0.25548    | 0.02959 |
|        |                                                       | Liver  | 50    | 1    | 0.002964   | 5.8212   | 0.023712    | 0.0045808  | 0.02959 |
|        |                                                       | Heart  | 50    | 1    | 0.0045676  | 5.3888   | 0.050243    | 0.011419   | 0.02959 |
|        |                                                       | Kidney | 50    | 1    | 0.0010536  | 6.8555   | 0.005268    | 0.0012041  | 0.02959 |
| 6      | Fatty acid biosynthesis                               | Plasma | 49    | 1    | 0.25548    | 1.3646   | 0.76645     | 0.25548    | 0       |
|        |                                                       | Liver  | 49    | 2    | 0.0017773  | 6.3327   | 0.015996    | 0.0033571  | 0       |
|        |                                                       | Heart  | 49    | 2    | 0.11603    | 2.1539   | 0.69617     | 0.17404    | 0       |
|        |                                                       | Kidney | 49    | 1    | 0.0010536  | 6.8555   | 0.005268    | 0.0012041  | 0       |
| 7      | Fatty acid elongation in mitochondria                 | Plasma | 27    | 1    | 0.25548    | 1.3646   | 0.76645     | 0.25548    | 0       |
|        |                                                       | Liver  | 27    | 1    | 0.002964   | 5.8212   | 0.023712    | 0.0045808  | 0       |
|        |                                                       | Heart  | 27    | 1    | 0.0045676  | 5.3888   | 0.050243    | 0.011419   | 0       |
|        |                                                       | Kidney | 27    | 1    | 0.0010536  | 6.8555   | 0.005268    | 0.0012041  | 0       |
| 8      | Pantothenate and CoA biosynthesis                     | Plasma | NA    |      |            |          |             |            |         |
|        |                                                       | Liver  | 27    | 1    | 5.37E-11   | 23.647   | 8.06E-10    | 2.28E-10   | 0.18014 |
|        |                                                       | Heart  | 27    | 1    | 0.50957    | 0.6742   | 1           | 0.58796    | 0.18014 |
|        |                                                       | Kidney | 27    | 1    | 8.11E-08   | 16.328   | 1.14E-06    | 3.24E-07   | 0.18014 |
| 9      | beta-Alanine metabolism                               | Plasma | NA    |      |            |          |             |            |         |
|        |                                                       | Liver  | 28    | 1    | 5.37E-11   | 23.647   | 8.06E-10    | 2.28E-10   | 0       |
|        |                                                       | Heart  | 28    | 1    | 0.50957    | 0.6742   | 1           | 0.58796    | 0       |
|        |                                                       | Kidney | 28    | 1    | 8.11E-08   | 16.328   | 1.14E-06    | 3.24E-07   | 0       |
| 10     | Glutathione metabolism                                | Plasma | NA    |      |            |          |             |            |         |
|        |                                                       | Liver  | 38    | 1    | 6.60E-06   | 11.928   | 7.26E-05    | 1.40E-05   | 0.23743 |
|        |                                                       | Heart  | 38    | 1    | 1.30E-08   | 18.156   | 1.95E-07    | 9.77E-08   | 0.23743 |
|        |                                                       | Kidney | 38    | 1    | 4.98E-07   | 14.512   | 4.98E-06    | 9.97E-07   | 0.23743 |
| 11     | Cysteine and methionine metabolism                    | Plasma | NA    |      |            |          |             |            |         |
|        |                                                       | Liver  | 56    | 1    | 6.60E-06   | 11.928   | 7.26E-05    | 1.40E-05   | 0.00735 |
|        |                                                       | Heart  | 56    | 1    | 1.30E-08   | 18.156   | 1.95E-07    | 9.77E-08   | 0.00735 |
|        |                                                       | Kidney | 56    | 1    | 4.98E-07   | 14.512   | 4.98E-06    | 9.97E-07   | 0.00735 |
| 12     | Arachidonic acid metabolism                           | Plasma | NA    |      |            |          |             |            |         |
|        |                                                       | Liver  | 62    | 1    | 0.027914   | 3.5786   | 0.14811     | 0.036503   | 0.21669 |
|        |                                                       | Heart  | 62    | 1    | 0.23483    | 1.4489   | 1           | 0.32022    | 0.21669 |
|        |                                                       | Kidney | 62    | 1    | 0.00040259 | 7.8176   | 0.0024155   | 0.00058558 | 0.21669 |
| 13     | Linoleic acid metabolism                              | Plasma | NA    |      |            |          |             |            |         |
|        |                                                       | Liver  | 15    | 1    | 0.035123   | 3.3489   | 0.14811     | 0.042649   | 0.65625 |
|        |                                                       | Heart  | 15    | 1    | 0.97705    | 0.023214 | 1           | 0.97705    | 0.65625 |
|        |                                                       | Kidney | 15    | 1    | 3.04E-06   | 12.703   | 2.43E-05    | 5.41E-06   | 0.65625 |
| 14     | Purine metabolism                                     | Plasma | NA    |      |            |          |             |            |         |
|        |                                                       | Liver  | 92    | 1    | 0.43236    | 0.8385   | 1           | 0.49001    | 0.00425 |
|        |                                                       | Heart  | 92    | 1    | 0.61199    | 0.49104  | 1           | 0.6557     | 0.00425 |
|        |                                                       | Kidney | 92    | 1    | 1.17E-09   | 20.566   | 1.76E-08    | 9.36E-09   | 0.00425 |
| 15     | Glycosylphosphatidylinositol(GPI)-anchor biosynthesis | Plasma | NA    |      |            |          |             |            |         |
|        |                                                       | Liver  | 14    | 1    | 0.66349    | 0.41024  | 1           | 0.70496    | 0.0439  |
|        |                                                       | Heart  | 14    | 1    | 0.0002639  | 8.2399   | 0.0031669   | 0.00098964 | 0.0439  |
|        |                                                       | Kidney | 14    | 1    | 2.63E-11   | 24.361   | 4.21E-10    | 4.21E-10   | 0.0439  |
| 16     | Ether lipid metabolism                                | Kidney | 23    | 1    | 0.37906    | 0.97007  | 0.37906     | 0.37906    | 0       |
| 17     | Starch and sucrose metabolism                         | Liver  | 50    | 1    | 5.46E-18   | 39.749   | 9.28E-17    | 4.64E-17   | 0.01265 |
| 18     | Pentose and glucuronate interconversions              | Liver  | 53    | 1    | 5.46E-18   | 39.749   | 9.28E-17    | 4.64E-17   | 0.009   |

Note: Total is the total number of compounds in the pathway; Hits are the number of compounds matched in that pathway; the Raw p is the original p value calculated from the enrichment analysis; the Holm p is the p value adjusted by Holm-Bonferroni method; the FDR p is the p value adjusted using False Discovery Rate; the Impact is the pathway impact value calculated from pathway topology analysis.
